# Supplementary material
Source: PubMed Central journal article supplement (PMC7449156)
Supplement: AAC.00773-20-s0001.pdf [file AAC.00773-20-s0001.pdf]

5 **Supplementary Figure 1**

6 **A)**

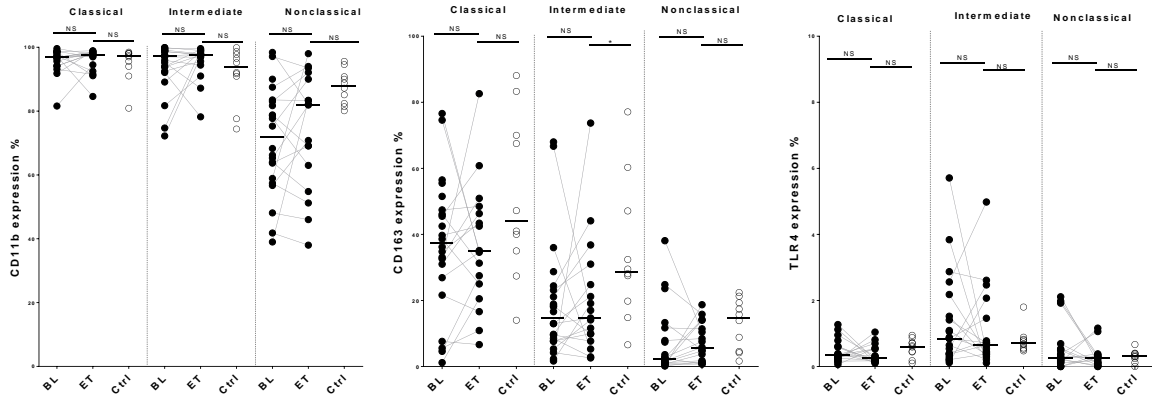

7  
8 **B)**

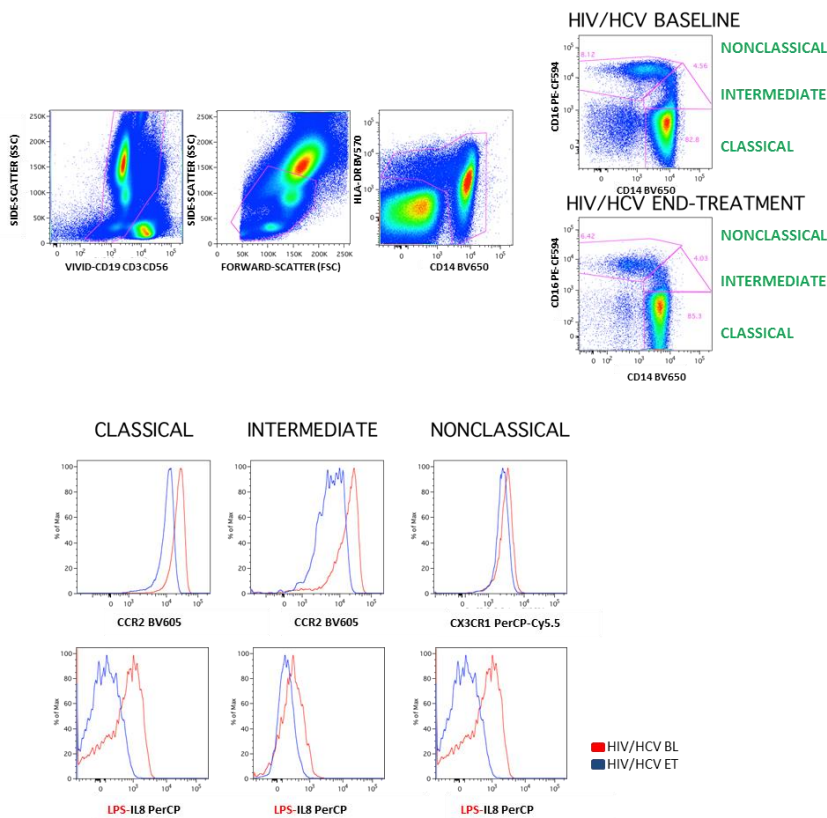

9

10 **Supplementary Figure 1. A) CD11b, CD163 and TLR4 expression before and after DAAs**  
 11 **treatment and in the HIV control group.** No differences were observed in the expression of  
 12 these markers neither after DAAs nor compared with the HIV control group. CD163 expression  
 13 in the intermediate subsets present higher levels in HIV control group respect the HIV/HCV

14 coinfecting group ( $p=0.045$ ). The Wilcoxon test was used to compare HIV/HCV coinfecting  
15 patients at baseline and end treatment. The Man-Whitney U was used to compare HIV/HCV-  
16 coinfecting patients and HIV-monoinfecting patients control group.  $*p<0.05$  and  $**p<0.001$ .  
17 Abbreviation: NS, not significant; BL, HIV/HCV Baseline; ET, HIV/HCV End of treatment;  
18 Ctrl, HIV control group. **B**) Schematic diagram of the gating strategy for monocyte subset in a  
19 HIV/HCV coinfecting subject before and after DAAs treatment. Histogram representation of IL8  
20 expression on classical, intermediate and nonclassical monocytes stimulated with LPS before  
21 and after DAAs treatment as a representative example.

22

23 **Supplementary Table 1. Characteristics of the confirmatory cohort.**

| Characteristic                                  | HCV/HIV BL (n=18)<br><i>Confirmatory Cohort</i> | HCV/HIV BL<br>(n=22) | P VALUE      |
|-------------------------------------------------|-------------------------------------------------|----------------------|--------------|
| Male sex, %                                     | 83                                              | 55                   | 0.053        |
| Age, y                                          | 51 [46-54]                                      | 47 [44-51]           | 0.186        |
| CD4 Nadir counts, cells/ $\mu$ L                | 64 [19-121]                                     | 172 [50-393]         | <b>0.009</b> |
| CD4 <sup>+</sup> T-cells counts, cells/ $\mu$ L | 637 [325-781]                                   | 671 [446-957]        | 0.196        |
| CD8 <sup>+</sup> T-cells counts, cells/ $\mu$ L | 870 [575-1537]                                  | 1038 [607-1310]      | 0.701        |
| Ratio CD4+ to CD8+ T Cells                      | 0.69 [0.36-0.94]                                | 0.72 [0.45-0.99]     | 0.540        |
| HIV RNA (Log <sub>10</sub> copies/mL)           | 1.3 [1.3-1.3]                                   | 1.3 [1.3 - 1.3]      | 1            |
| HCV RNA (Log <sub>10</sub> copies/mL)           | 6.4 [5.7 – 6.8]                                 | 6.8 [6.2 – 7.2]      | <b>0.020</b> |
| HCV genotype-1, %                               | 72.2                                            | 77.8                 | 0.714        |
| Fibrosis stage, %                               |                                                 |                      |              |
| 0-1                                             | 38.9                                            | 44.4                 | 0.735        |
| 2                                               | 11.1                                            | 44.4                 | <b>0.026</b> |
| 3                                               | 16.7                                            | 5.5                  | 0.289        |
| 4                                               | 33.3                                            | 5.5                  | <b>0.035</b> |
| Cirrhosis, %                                    | 33.3                                            | 5.5                  | <b>0.035</b> |

24 N.A.: Not applicable. Categorical variables were expressed as percentage and  
 25 continuous variables as median, interquartile range [IQR]. Chi-square test and Mann-  
 26 Whitney U test were used to compare categorical and continuous variables,  
 27 respectively.

28  
 29  
 30

31 **Supplementary Figure 2.**

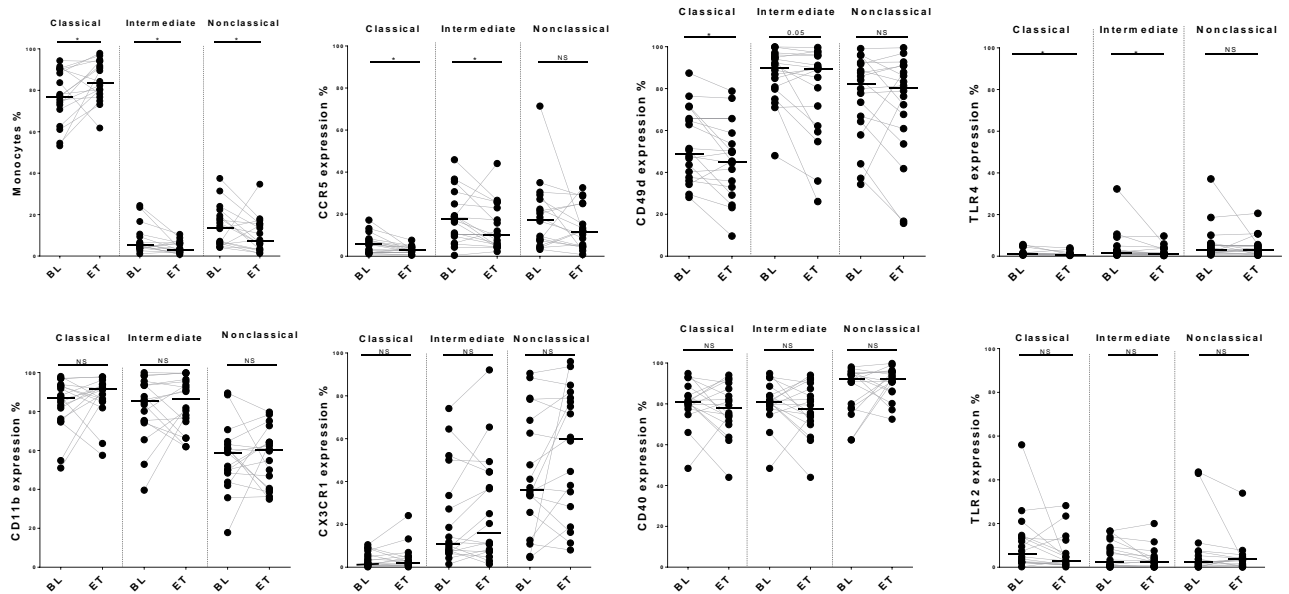

32  
33

34 **Supplementary Figure 2. Results of the confirmatory cohort.** After treatment with DAAs the  
 35 percentage of classical monocytes increased (p=0.02) and the intermediate and nonclassical  
 36 subset diminished (p=0.005; p=0.03; respectively). In addition, a decrease in the levels of  
 37 CCR5, CD49d and TLR4 expression after treatment with DAAs was observed in classical an  
 38 intermediate monocytes (p=0.002; p=0.02; p=0.005; p=0.05; p=0.0004; p=0.01; respectively).  
 39 No differences were observed in CD11b, CX3CR1, CD40 and TLR2 expression. . The  
 40 Wilcoxon test was used to compare HIV/HCV coinfectd patients at baseline and at the end  
 41 treatment. The Man-Whitney U was used to compare HIV/HCV-coinfectd patients and HIV-  
 42 monoinfectd patients control group. \*p<0.05 and \*\*p<0.001. Abbreviation: NS, not  
 43 significant; BL, HIV/HCV Baseline; ET, HIV/HCV End treatment; Ctrl, HIV control group.

44

45 **Supplementary Figure 3**

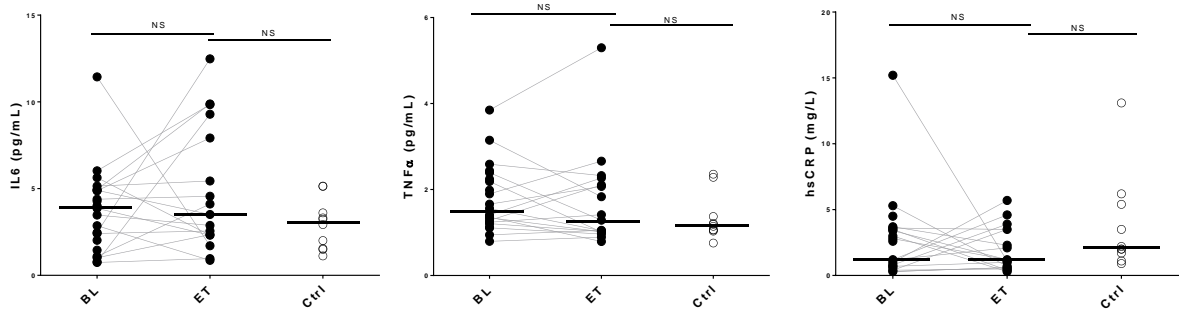

46  
47

48 **Supplementary Figure 3. Effect of DAAs in the levels of IL6, TNF- $\alpha$  and hsCRP levels**  
49 **changes after DAAs therapy.** The Wilcoxon test was used to compare HIV/HCV-coinfected  
50 patients at baseline and end treatment. The Man-Whitney U was used to compare HIV/HCV-  
51 coinfecting patients and HIV-monoinfected patients control group. Abbreviation: hsCRP, high  
52 sensitivity C reactive protein; NS, not significant; BL, HIV/HCV Baseline; ET, HIV/HCV End  
53 treatment; Ctrl, HIV control group.

54 **Supplementary Table 2. Multiple cytokine combinations in the different monocyte**  
 55 **subsets after LPS estimation.**

| IL1 $\alpha$ IL1 $\beta$ IL6 IL8 IL10 TNF $\alpha$ <sup>a</sup> | Classical Monocytes   |                         | Intermediate Monocytes |            | Nonclassical Monocytes |            |
|-----------------------------------------------------------------|-----------------------|-------------------------|------------------------|------------|------------------------|------------|
|                                                                 | BL vs ET <sup>b</sup> | ET vs Ctrl <sup>c</sup> | BL vs ET               | ET vs Ctrl | BL vs ET               | ET vs Ctrl |
| +++++                                                           | 0.024                 | 0.564                   | 0.671                  | 0.802      | 1.000                  | 1.000      |
| -++++                                                           | 0.023                 | 0.020                   | 0.315                  | 0.725      | 0.755                  | 0.802      |
| + - + + +                                                       | 0.229                 | 0.451                   | 0.932                  | 0.802      | 1.000                  | 1.000      |
| ++ - + + +                                                      | 0.005                 | 0.108                   | 0.193                  | 0.802      | 0.887                  | 0.802      |
| +++ - + +                                                       | 0.734                 | 0.328                   | 0.051                  | 0.841      | 0.470                  | 1.000      |
| ++++ - +                                                        | 0.054                 | 0.269                   | 0.552                  | 0.802      | 1.000                  | 1.000      |
| ++++ + -                                                        | 0.671                 | 0.280                   | 0.810                  | 1.000      | 1.000                  | 1.000      |
| -- + + + +                                                      | 0.193                 | 0.006                   | 0.479                  | 0.451      | 0.630                  | 1.000      |
| - + - + + +                                                     | 0.016                 | 0.004                   | 0.030                  | 1.000      | 0.755                  | 0.802      |
| + - - + + +                                                     | 0.044                 | 0.132                   | 0.630                  | 1.000      | 0.865                  | 0.880      |
| - + + - + +                                                     | 0.218                 | 0.012                   | 0.218                  | 0.422      | 0.315                  | 0.980      |
| + - + - + +                                                     | 0.229                 | 1.000                   | 0.887                  | 0.802      | 0.630                  | 1.000      |
| + + - - + +                                                     | 0.095                 | 0.063                   | 0.041                  | 0.651      | 0.315                  | 0.132      |
| - + + + - +                                                     | 0.066                 | 0.016                   | 0.506                  | 0.280      | 1.000                  | 1.000      |
| + - + + - +                                                     | 0.119                 | 0.315                   | 0.810                  | 1.000      | 0.810                  | 1.000      |
| ++ - + - +                                                      | 0.004                 | 0.688                   | 0.229                  | 1.000      | 0.810                  | 1.000      |
| +++ - - +                                                       | 0.955                 | 0.482                   | 0.470                  | 1.000      | 0.630                  | 1.000      |
| - + + + + -                                                     | 0.497                 | 0.001                   | 0.229                  | 1.000      | 1.000                  | 1.000      |
| + - + + + -                                                     | 0.350                 | 0.802                   | 0.810                  | 1.000      | 0.755                  | 0.802      |
| ++ - + + -                                                      | 0.282                 | 0.160                   | 0.630                  | 1.000      | 1.000                  | 1.000      |
| +++ - + -                                                       | 0.734                 | 0.315                   | 1.000                  | 1.000      | 1.000                  | 1.000      |
| ++++ + - -                                                      | 0.188                 | 0.380                   | 0.470                  | 1.000      | 1.000                  | 1.000      |
| - - - + + +                                                     | 0.002                 | 0.001                   | 0.174                  | 0.616      | 0.336                  | 1.000      |
| - - + - + +                                                     | 0.745                 | 0.002                   | 0.821                  | 0.292      | 0.955                  | 0.315      |
| - + - - + +                                                     | 0.257                 | 0.000                   | 0.149                  | 0.292      | 0.799                  | 0.145      |
| + - - - + +                                                     | 0.034                 | 0.014                   | 0.084                  | 0.616      | 0.039                  | 0.292      |
| - - + + - +                                                     | 0.100                 | 0.007                   | 0.372                  | 0.315      | 0.723                  | 0.616      |
| - + - + - +                                                     | 0.022                 | 0.025                   | 0.051                  | 0.900      | 0.810                  | 1.000      |
| + - - + - +                                                     | 0.000                 | 0.530                   | 0.149                  | 0.670      | 0.713                  | 0.880      |
| - + + - - +                                                     | 0.350                 | 0.209                   | 0.013                  | 0.725      | 0.552                  | 0.802      |
| + - + - - +                                                     | 0.257                 | 0.841                   | 0.470                  | 1.000      | 0.810                  | 1.000      |
| + + - - - +                                                     | 0.015                 | 0.436                   | 0.229                  | 1.000      | 0.174                  | 0.802      |
| - - + + + -                                                     | 0.843                 | 0.002                   | 0.202                  | 0.802      | 1.000                  | 1.000      |
| - + - + + -                                                     | 0.084                 | 0.000                   | 0.084                  | 0.802      | 1.000                  | 1.000      |
| + - - + + -                                                     | 0.017                 | 0.315                   | 0.149                  | 1.000      | 0.810                  | 1.000      |
| - + + - + -                                                     | 0.444                 | 0.009                   | 0.269                  | 0.763      | 0.766                  | 0.880      |
| + - + - + -                                                     | 0.017                 | 0.451                   | 0.692                  | 0.802      | 1.000                  | 1.000      |
| + + - - + -                                                     | 0.977                 | 0.050                   | 0.092                  | 1.000      | 0.630                  | 1.000      |

|             |       |       |       |       |       |       |
|-------------|-------|-------|-------|-------|-------|-------|
| - + + + - - | 0.506 | 0.002 | 0.039 | 0.564 | 0.932 | 0.802 |
| + - + + - - | 0.021 | 0.422 | 0.462 | 0.616 | 1.000 | 1.000 |
| + + - + - - | 0.041 | 0.192 | 0.336 | 1.000 | 1.000 | 1.000 |
| + + + - - - | 0.497 | 0.802 | 0.810 | 0.670 | 1.000 | 1.000 |
| - - - - + + | 0.444 | 0.000 | 0.745 | 0.002 | 0.179 | 0.008 |
| - - - + - + | 0.002 | 0.005 | 0.003 | 0.960 | 0.213 | 0.547 |
| - - + - - + | 0.552 | 0.018 | 0.777 | 0.688 | 0.110 | 0.616 |
| - + - - - + | 0.060 | 0.393 | 0.029 | 0.547 | 0.229 | 0.530 |
| + - - - - + | 0.004 | 0.633 | 0.149 | 0.564 | 0.002 | 0.407 |
| - - - + + - | 0.054 | 0.003 | 0.030 | 0.219 | 0.692 | 0.960 |
| - - + - + - | 0.671 | 0.001 | 0.223 | 0.145 | 0.133 | 0.145 |
| - + - - + - | 0.234 | 0.001 | 0.005 | 0.960 | 0.411 | 0.616 |
| + - - - + - | 0.016 | 0.120 | 0.008 | 1.000 | 0.470 | 1.000 |
| - - + + - - | 0.590 | 0.003 | 0.403 | 0.006 | 0.515 | 0.315 |
| - + - + - - | 0.257 | 0.012 | 0.329 | 0.366 | 0.396 | 0.802 |
| + - - + - - | 0.000 | 0.228 | 0.004 | 1.000 | 0.157 | 0.802 |
| - + + - - - | 0.799 | 0.011 | 0.079 | 0.514 | 0.350 | 0.451 |
| + - + - - - | 0.218 | 0.025 | 0.282 | 0.393 | 0.087 | 0.616 |
| + + - - - - | 0.004 | 0.763 | 0.229 | 0.393 | 0.810 | 1.000 |
| - - - - - + | 0.070 | 0.016 | 0.022 | 0.063 | 0.295 | 0.160 |
| - - - - + - | 0.524 | 0.132 | 0.041 | 0.120 | 0.506 | 0.422 |
| - - - + - - | 0.028 | 0.145 | 0.098 | 0.063 | 0.006 | 0.547 |
| - - + - - - | 0.865 | 0.002 | 0.899 | 0.035 | 0.571 | 0.025 |
| - + - - - - | 0.357 | 0.467 | 0.000 | 0.192 | 0.034 | 0.841 |
| + - - - - - | 0.002 | 0.228 | 0.003 | 0.744 | 0.008 | 0.802 |

56

57 <sup>a</sup>Monocyte subset showing the presence (+, symbol) or absence (-, symbol) of cytokine  
58 combinations in the order represented in the column heading. <sup>b</sup>p value of Wilcoxon test  
59 was used to compared variables before (BL) and after treatment (ET). <sup>c</sup>p value of Chi-  
60 square test and Mann-Whitney U test were used to compare categorical and continuous  
61 variables respectively, between ET and HIV monoinfected control group. Significant  
62 values are shadowed.

63 **Supplementary Figure 4.**

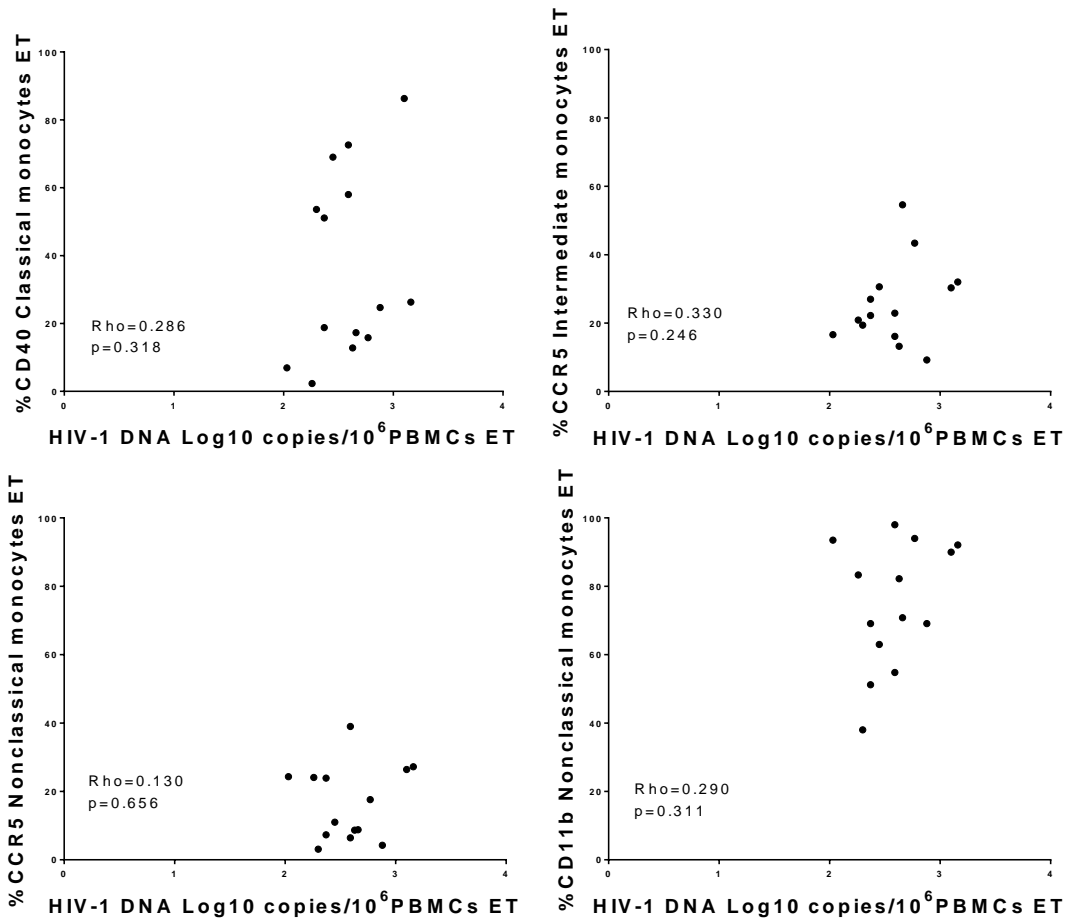

64  
65

66 **Supplementary Figure 4. Association of cell-associated HIV-1 DNA levels with activation**  
67 **of monocytes at the end of treatment.** Graphical representation of the relationship between  
68 HIV-1 DNA Log<sub>10</sub> copies/10<sup>6</sup> PBMCs and the percentage of monocytes expressing CD40,  
69 CCR5 and CD11b after DAAs treatment. Spearman correlation coefficient test was used.

70
